# Supplementary material
Source: HighWire-hosted journal article supplement (https://hw-f5-jim.highwire.org/content/jim-2017-000457)
Supplement: inline-supplementary-material-2 [file inline-supplementary-material-2.pdf]

| Immunological Module |        |          |         | Malignancy Module |         |          |         |
|----------------------|--------|----------|---------|-------------------|---------|----------|---------|
| microRNA             | weight | mRNA     | weight  | microRNA          | weight  | mRNA     | weight  |
| hsa-miR-22           | 0.5257 | PPP4R1   | -0.1379 | hsa-let-7g        | -0.5736 | PKMYT1   | -0.1364 |
| hsa-miR-98           | 0.4795 | STOM     | -0.1210 | hsa-miR-26b       | -0.4642 | C19orf39 | -0.1281 |
| hsa-miR-22#          | 0.4775 | AIM2     | -0.1197 | hsa-miR-106a      | 0.3959  | HIST2H3C | -0.1254 |
| hsa-miR-661          | 0.3332 | PIK3R5   | -0.1186 | hsa-miR-17        | 0.3745  | TSPAN9   | 0.1230  |
| hsa-miR-339-         | 0.2579 | SIGLEC10 | -0.1120 | hsa-miR-328       | -0.2710 | TRAPPC3  | 0.1218  |
| hsa-miR-197          | 0.2330 | IRF2BP2  | 0.1098  | hsa-miR-200c      | -0.1873 | FAU      | 0.1150  |
| hsa-miR-628-         | 0.1653 | IL2RA    | -0.1086 | hsa-let-7f        | -0.1744 | HIST2H3A | -0.1048 |
| hsa-miR-629          | 0.0766 | GPR34    | -0.1079 | hsa-miR-26a       | -0.1397 | E2F1     | -0.1037 |
| hsa-miR-340#         | 0.0253 | FAM100A  | 0.1055  |                   |         | UBE2C    | -0.1035 |
| hsa-miR-28           | 0.0066 | ZNF813   | -0.1045 |                   |         | CACNA1A  | -0.1029 |
|                      |        | HCLS1    | -0.1009 |                   |         | RPS6KC1  | -0.1029 |
|                      |        | HIST1H4E | 0.1005  |                   |         | HIST1H4B | -0.1014 |
|                      |        | CD53     | -0.1004 |                   |         | SMC4     | -0.0992 |
|                      |        | METTL2A  | 0.0983  |                   |         | MAPRE1   | -0.0991 |
|                      |        | LAT2     | -0.0939 |                   |         | HECTD3   | 0.0990  |
|                      |        | GPATCH1  | -0.0938 |                   |         | COPS8    | -0.0988 |
|                      |        | FCGR3A   | -0.0932 |                   |         | KIAA1191 | 0.0987  |
|                      |        | MYO5A    | -0.0915 |                   |         | MCM7     | -0.0982 |
|                      |        | MAPK15   | 0.0911  |                   |         | NUP133   | -0.0969 |
|                      |        | ARID4B   | 0.0908  |                   |         | CHID1    | -0.0962 |
|                      |        | C17orf87 | -0.0908 |                   |         | HSD11B1L | -0.0958 |
|                      |        | PITX1    | -0.0905 |                   |         | DCAF15   | -0.0957 |
|                      |        | VTI1B    | -0.0880 |                   |         | NUF2     | -0.0955 |
|                      |        | GPR65    | -0.0878 |                   |         | CDCA1    | -0.0955 |
|                      |        | ZC3H12D  | -0.0878 |                   |         | SYNGAP1  | -0.0942 |
|                      |        | RNF141   | -0.0876 |                   |         | YPEL1    | -0.0925 |
|                      |        | LY86     | -0.0868 |                   |         | ZNF564   | -0.0920 |
|                      |        | KLHL6    | -0.0864 |                   |         | FAM120A  | 0.0912  |
|                      |        | MS4A4A   | -0.0856 |                   |         | SULT1E1  | -0.0908 |
|                      |        | TAGAP    | -0.0856 |                   |         | NELL1    | -0.0907 |
|                      |        | ARHGAP30 | -0.0853 |                   |         | HOXD9    | -0.0902 |
|                      |        | DAB2     | -0.0848 |                   |         | GADD45A  | 0.0894  |
|                      |        | KLRD1    | -0.0845 |                   |         | HIST1H4A | -0.0891 |
|                      |        | RNASE2   | -0.0844 |                   |         | CRIP1    | 0.0881  |
|                      |        | IKZF1    | -0.0842 |                   |         | HMGCL    | 0.0864  |
|                      |        | STOML1   | -0.0824 |                   |         | SCYL1BP1 | -0.0860 |
|                      |        | GIMAP5   | -0.0822 |                   |         | ZWINT    | -0.0856 |
|                      |        | LRRC25   | -0.0815 |                   |         | MDM4     | -0.0847 |
|                      |        | GIMAP7   | -0.0804 |                   |         | CSTF1    | -0.0841 |

|  |           |         |  |  |           |         |
|--|-----------|---------|--|--|-----------|---------|
|  | CD4       | -0.0801 |  |  | SNRPD3    | -0.0829 |
|  | SLCO2B1   | -0.0800 |  |  | MIR623    | -0.0819 |
|  | SLAMF8    | -0.0798 |  |  | LOC653604 | -0.0803 |
|  | GMFG      | -0.0794 |  |  | HIST2H3D  | -0.0803 |
|  | LCT       | -0.0794 |  |  | UBL4B     | -0.0793 |
|  | P2RY13    | -0.0793 |  |  | DCTN5     | -0.0792 |
|  | DUSP13    | -0.0786 |  |  | DNMT3A    | -0.0774 |
|  | KIF5B     | 0.0785  |  |  | MEGF9     | 0.0768  |
|  | RASAL3    | -0.0778 |  |  | TMBIM4    | 0.0765  |
|  | SPI1      | -0.0773 |  |  | PDXK      | 0.0760  |
|  | IL12RB1   | -0.0772 |  |  | MIR181B1  | -0.0756 |
|  | AOAH      | -0.0766 |  |  | HOTAIR    | -0.0754 |
|  | IFI30     | -0.0765 |  |  | SPATA2    | -0.0752 |
|  | ZNF480    | -0.0760 |  |  | EHD1      | 0.0749  |
|  | ZNF552    | -0.0753 |  |  | KIAA0101  | -0.0743 |
|  | ARHGDIB   | -0.0752 |  |  | EXO1      | -0.0743 |
|  | FCRL3     | -0.0744 |  |  | CNDP2     | 0.0738  |
|  | SNN       | 0.0742  |  |  | TTC23     | 0.0733  |
|  | CD3D      | -0.0735 |  |  | PEA15     | 0.0729  |
|  | E2F5      | 0.0729  |  |  | STK40     | 0.0728  |
|  | GIMAP4    | -0.0722 |  |  | HIST1H2AK | -0.0725 |
|  | TMEM42    | 0.0720  |  |  | ZGPAT     | -0.0725 |
|  | TCERG1    | 0.0717  |  |  | TP53BP2   | -0.0724 |
|  | LRRK2     | -0.0712 |  |  | MAP7D1    | 0.0724  |
|  | NCKAP1L   | -0.0710 |  |  | RPRC1     | 0.0724  |
|  | OSBPL8    | -0.0704 |  |  | SOCS5     | -0.0717 |
|  | C12orf59  | -0.0700 |  |  | PCDH10    | -0.0714 |
|  | C1orf218  | -0.0699 |  |  | PSME1     | 0.0711  |
|  | ITGAL     | -0.0693 |  |  | EHMT2     | -0.0705 |
|  | SPIRE1    | -0.0691 |  |  | HIST1H2AM | -0.0704 |
|  | ARHGEF6   | -0.0690 |  |  | SHF       | -0.0702 |
|  | FBXO6     | -0.0687 |  |  | LOC554226 | -0.0692 |
|  | PTPN5     | -0.0675 |  |  | SLC2A4RG  | -0.0689 |
|  | FBXO22    | 0.0675  |  |  | NLRX1     | 0.0688  |
|  | MAP3K7IP1 | 0.0666  |  |  | LOC400455 | 0.0682  |
|  | CSF2RA    | -0.0657 |  |  | PHF11     | 0.0680  |
|  | RASGEF1A  | 0.0656  |  |  | ARHGEF7   | -0.0680 |
|  | AP1B1     | -0.0652 |  |  | RNF2      | -0.0675 |
|  | CARD16    | -0.0652 |  |  | AKR1A1    | 0.0673  |
|  | WAS       | -0.0651 |  |  | ALDH9A1   | 0.0672  |
|  | CD300LF   | -0.0647 |  |  | SERPINB8  | 0.0671  |
|  | SH2D1A    | -0.0632 |  |  | FBXO46    | -0.0669 |

|  |          |         |  |  |           |         |
|--|----------|---------|--|--|-----------|---------|
|  | PIK3CG   | -0.0631 |  |  | LOC400804 | -0.0669 |
|  | C1QA     | -0.0630 |  |  | C1orf140  | -0.0669 |
|  | THAP4    | 0.0629  |  |  | MADCAM1   | -0.0666 |
|  | STAB1    | -0.0621 |  |  | CDCP1     | 0.0666  |
|  | GPBAR1   | -0.0620 |  |  | FTHL3     | 0.0666  |
|  | RGL3     | 0.0613  |  |  | CNIH2     | -0.0661 |
|  | C6orf47  | -0.0611 |  |  | VAMP8     | 0.0659  |
|  | LILRB1   | -0.0609 |  |  | NTN3      | -0.0655 |
|  | MGC88374 | -0.0609 |  |  | ZNF93     | -0.0645 |
|  | C14orf53 | -0.0609 |  |  | GTF3C4    | -0.0640 |
|  | FGD2     | -0.0605 |  |  | ARHGAP11A | -0.0639 |
|  | ITFG3    | 0.0603  |  |  | NUPL1     | -0.0625 |
|  | SCT      | -0.0602 |  |  | SCUBE1    | -0.0620 |
|  | TMED8    | -0.0602 |  |  | CHES1     | 0.0616  |
|  | TOMM20   | 0.0600  |  |  | FOXN3     | 0.0616  |
|  | CXorf21  | -0.0598 |  |  | GRB2      | 0.0614  |
|  | DEF6     | -0.0595 |  |  | KIAA1524  | -0.0612 |
|  | APOC1    | -0.0594 |  |  | PSAP      | 0.0608  |
|  | RNF149   | -0.0591 |  |  | HIST2H2AB | -0.0607 |
|  | EGFL6    | -0.0591 |  |  | TOP2B     | -0.0598 |
|  | CIDEB    | -0.0590 |  |  | ATG2A     | 0.0594  |
|  | NCF2     | -0.0589 |  |  | PSMD5     | 0.0591  |
|  | PAAF1    | 0.0588  |  |  | C9orf100  | -0.0590 |
|  | BTK      | -0.0585 |  |  | BACH1     | -0.0587 |
|  | GAGE12B  | -0.0583 |  |  | NFU1      | 0.0585  |
|  | ARRDC5   | -0.0581 |  |  | DUSP23    | 0.0582  |
|  | PRDM7    | 0.0578  |  |  | C2orf48   | -0.0581 |
|  | NLRP5    | -0.0573 |  |  | WDR4      | -0.0578 |
|  | NALP5    | -0.0573 |  |  | TMEFF2    | -0.0576 |
|  | PLA2G15  | -0.0567 |  |  | CENPQ     | -0.0575 |
|  | GIMAP6   | -0.0566 |  |  | SMG7      | -0.0573 |
|  | SEPW1    | -0.0564 |  |  | MED19     | 0.0567  |
|  | ASCL1    | -0.0561 |  |  | KIF18B    | -0.0566 |
|  | PPP3R1   | -0.0555 |  |  | C11orf71  | 0.0565  |
|  | CD226    | -0.0554 |  |  | MARK4     | -0.0556 |
|  | HCK      | -0.0551 |  |  | DPH3      | -0.0555 |
|  | DPEP2    | -0.0549 |  |  | EARS2     | -0.0553 |
|  | MEFV     | -0.0548 |  |  | HOXC4     | -0.0551 |
|  | SLA      | -0.0547 |  |  | SETD3     | 0.0534  |
|  | C1orf116 | -0.0547 |  |  | TAF1A     | -0.0532 |
|  | PIP4K2B  | 0.0545  |  |  | TSPAN1    | -0.0532 |
|  | GPR125   | 0.0539  |  |  | FGD3      | 0.0528  |

|  |          |         |  |  |           |         |
|--|----------|---------|--|--|-----------|---------|
|  | HIST1H4C | 0.0538  |  |  | MFSD6     | 0.0527  |
|  | NLRC5    | -0.0534 |  |  | FOXR1     | -0.0524 |
|  | RBM26    | 0.0530  |  |  | FLJ90757  | -0.0522 |
|  | HLA-E    | -0.0530 |  |  | TRAF2     | -0.0517 |
|  | RBM4B    | 0.0530  |  |  | GPC3      | -0.0516 |
|  | ZNF845   | -0.0530 |  |  | HIST1H3B  | -0.0515 |
|  | TSGA14   | 0.0528  |  |  | CIC       | -0.0511 |
|  | CTSS     | -0.0528 |  |  | TFB2M     | -0.0508 |
|  | SLAMF6   | -0.0527 |  |  | KCNJ6     | -0.0506 |
|  | IRF8     | -0.0524 |  |  | CYHR1     | -0.0497 |
|  | BRE      | 0.0523  |  |  | SLC7A1    | 0.0493  |
|  | FLVCR2   | -0.0512 |  |  | ZNF768    | -0.0490 |
|  | ACBD4    | 0.0509  |  |  | OR2AG2    | -0.0487 |
|  | C11orf24 | -0.0504 |  |  | PMVK      | 0.0483  |
|  | GAGE7    | -0.0504 |  |  | GLRX      | 0.0483  |
|  | PRRT2    | 0.0500  |  |  | DTX3L     | 0.0478  |
|  | MPHOSPH8 | -0.0499 |  |  | NFASC     | -0.0477 |
|  | LY96     | -0.0496 |  |  | MIR663B   | -0.0475 |
|  | COPS7B   | 0.0492  |  |  | FANCD2    | -0.0475 |
|  | TRIM74   | 0.0490  |  |  | NUDT14    | 0.0472  |
|  | LTA      | -0.0490 |  |  | TLR3      | 0.0472  |
|  | GZMA     | -0.0489 |  |  | PER2      | 0.0471  |
|  | MLKL     | -0.0488 |  |  | C11orf82  | -0.0470 |
|  | PARP15   | -0.0486 |  |  | MIR658    | -0.0465 |
|  | RAB11B   | 0.0482  |  |  | RPUSD3    | -0.0462 |
|  | LSM4     | 0.0479  |  |  | CCNA2     | -0.0461 |
|  | GALM     | -0.0478 |  |  | PQLC1     | 0.0459  |
|  | ECSCR    | -0.0477 |  |  | ZNF793    | -0.0452 |
|  | DET1     | 0.0477  |  |  | RNPS1     | -0.0450 |
|  | GBP2     | -0.0472 |  |  | VIL2      | 0.0449  |
|  | DHX58    | -0.0463 |  |  | EZR       | 0.0449  |
|  | C1GALT1  | -0.0454 |  |  | RB1       | 0.0448  |
|  | VPS28    | 0.0454  |  |  | MIR937    | -0.0445 |
|  | SERINC1  | -0.0454 |  |  | FAM45B    | -0.0443 |
|  | DBF4B    | 0.0453  |  |  | NHLRC2    | -0.0437 |
|  | IL18     | -0.0449 |  |  | HIST1H2AH | -0.0437 |
|  | SFRS15   | 0.0448  |  |  | TAGLN3    | -0.0434 |
|  | CD86     | -0.0446 |  |  | PSMB10    | 0.0432  |
|  | GAGE2B   | -0.0440 |  |  | IPO13     | 0.0430  |
|  | ZDHHC12  | 0.0439  |  |  | PSD4      | 0.0430  |
|  | MCTP1    | -0.0439 |  |  | MIR572    | -0.0427 |
|  | NKG7     | -0.0439 |  |  | MIR657    | -0.0426 |

|  |           |         |  |  |           |         |
|--|-----------|---------|--|--|-----------|---------|
|  | GAGE12F   | -0.0438 |  |  | TSNAX     | -0.0424 |
|  | USP46     | -0.0438 |  |  | LOC550643 | 0.0417  |
|  | CGGBP1    | 0.0437  |  |  | ATOX1     | 0.0416  |
|  | USP15     | -0.0436 |  |  | LOC641522 | -0.0416 |
|  | RHOC      | -0.0435 |  |  | ARL17B    | -0.0416 |
|  | AIF1      | -0.0433 |  |  | C14orf64  | 0.0412  |
|  | CD37      | -0.0430 |  |  | KIAA0247  | 0.0410  |
|  | C1QB      | -0.0429 |  |  | TAS2R10   | -0.0409 |
|  | PQLC3     | -0.0428 |  |  | GPR125    | -0.0405 |
|  | TRPM2     | -0.0427 |  |  | PRDM7     | -0.0403 |
|  | POLR3GL   | -0.0427 |  |  | ENPP5     | 0.0402  |
|  | CCL5      | -0.0426 |  |  | RAE1      | -0.0400 |
|  | ATG4B     | 0.0418  |  |  | SYF2      | 0.0398  |
|  | UPP1      | -0.0417 |  |  | IQCG      | 0.0397  |
|  | CSF1R     | -0.0417 |  |  | CLDN23    | 0.0397  |
|  | ABI3      | -0.0416 |  |  | LAT2      | 0.0397  |
|  | ORMDL2    | -0.0413 |  |  | RPS27A    | 0.0396  |
|  | RASGRP3   | -0.0412 |  |  | TOR2A     | 0.0396  |
|  | H1FX      | 0.0407  |  |  | SLC2A11   | -0.0396 |
|  | ZNF692    | 0.0407  |  |  | ARL3      | -0.0393 |
|  | MYO1C     | -0.0406 |  |  | MIR134    | -0.0387 |
|  | SGK3      | -0.0406 |  |  | WWC3      | 0.0386  |
|  | RBM19     | 0.0402  |  |  | BMPER     | -0.0386 |
|  | MFN2      | -0.0401 |  |  | NOX5      | -0.0381 |
|  | SRGN      | -0.0399 |  |  | TPRG1L    | 0.0380  |
|  | PRF1      | -0.0398 |  |  | ZMYM5     | -0.0379 |
|  | GAGE5     | -0.0396 |  |  | PABPC4L   | -0.0377 |
|  | ATP7B     | 0.0396  |  |  | FBXO5     | -0.0373 |
|  | ZNF793    | 0.0393  |  |  | CLEC2B    | 0.0372  |
|  | WHAMM     | -0.0387 |  |  | HIST1H2BG | -0.0372 |
|  | PUM1      | 0.0387  |  |  | GSG2      | -0.0369 |
|  | HIST1H2BN | 0.0387  |  |  | TTC39A    | 0.0367  |
|  | BDP1      | 0.0386  |  |  | HJURP     | -0.0367 |
|  | ANKRD26   | 0.0383  |  |  | PCM1      | 0.0366  |
|  | SON       | 0.0382  |  |  | INTS9     | 0.0364  |
|  | SNORA14B  | 0.0381  |  |  | DNA2      | -0.0362 |
|  | ZNF613    | -0.0381 |  |  | IGF2AS    | -0.0362 |
|  | C9orf3    | 0.0381  |  |  | ANXA1     | 0.0360  |
|  | HLA-DMA   | -0.0379 |  |  | ATP6V0E1  | 0.0360  |
|  | IGFALS    | 0.0379  |  |  | MPZL2     | 0.0359  |
|  | TMEM86A   | -0.0379 |  |  | OSBP      | 0.0358  |
|  | GTF3C4    | 0.0377  |  |  | CBX5      | -0.0357 |

|  |          |         |  |  |          |         |
|--|----------|---------|--|--|----------|---------|
|  | SETMAR   | 0.0375  |  |  | XYLT2    | 0.0353  |
|  | SP100    | -0.0374 |  |  | GPR20    | -0.0352 |
|  | GAGE12C  | -0.0373 |  |  | CHRNA1   | -0.0351 |
|  | BECN1    | -0.0368 |  |  | TOP2A    | -0.0349 |
|  | NCF4     | -0.0367 |  |  | KIF23    | -0.0349 |
|  | BTN3A2   | -0.0367 |  |  | RFX5     | -0.0345 |
|  | CYTH4    | -0.0366 |  |  | SNRPC    | -0.0343 |
|  | PSCD4    | -0.0366 |  |  | PCDH24   | -0.0342 |
|  | KLRC3    | -0.0362 |  |  | GPR133   | -0.0340 |
|  | TIAL1    | 0.0361  |  |  | PYCR2    | -0.0338 |
|  | CYB5R4   | -0.0361 |  |  | CLEC9A   | 0.0338  |
|  | ZNF48    | 0.0359  |  |  | BIRC2    | 0.0337  |
|  | EOMES    | -0.0359 |  |  | C19orf47 | -0.0333 |
|  | SLC35A2  | -0.0358 |  |  | HIC2     | -0.0332 |
|  | ZNF789   | 0.0356  |  |  | CACNA1C  | -0.0329 |
|  | ANKRD36  | 0.0354  |  |  | MLLT11   | -0.0326 |
|  | MAP1LC3B | -0.0352 |  |  | MRPL9    | -0.0324 |
|  | STAU2    | 0.0351  |  |  | CACNA1G  | -0.0322 |
|  | LHFPL2   | -0.0351 |  |  | MYH6     | -0.0320 |
|  | MTA1     | 0.0349  |  |  | AMFR     | 0.0319  |
|  | DMXL2    | 0.0348  |  |  | SDCCAG3  | -0.0318 |
|  | KIAA0247 | -0.0347 |  |  | HOOK2    | -0.0316 |
|  | LILRA2   | -0.0342 |  |  | FRMD3    | 0.0315  |
|  | PSTK     | 0.0340  |  |  | CYP26B1  | -0.0313 |
|  | FAM36A   | 0.0338  |  |  | SASH1    | 0.0313  |
|  | SEC22B   | -0.0336 |  |  | AZI1     | -0.0312 |
|  | MPP1     | -0.0331 |  |  | ZNF284   | -0.0312 |
|  | CASC2    | 0.0331  |  |  | PCDHA4   | -0.0311 |
|  | PTAFR    | -0.0331 |  |  | HOXD4    | -0.0311 |
|  | UTP18    | -0.0329 |  |  | HOXC8    | -0.0310 |
|  | SP110    | -0.0328 |  |  | ZSCAN2   | -0.0310 |
|  | NOD3     | -0.0328 |  |  | EEF2     | 0.0309  |
|  | NLRC3    | -0.0328 |  |  | MUL1     | 0.0308  |
|  | DNASE2B  | -0.0322 |  |  | C1orf166 | 0.0308  |
|  | ATP5J    | 0.0312  |  |  | FTHL12   | 0.0308  |
|  | C21orf66 | 0.0311  |  |  | SEC31A   | 0.0308  |
|  | MAF1     | 0.0307  |  |  | UBE3B    | 0.0308  |
|  | YIPF1    | -0.0307 |  |  | RAB40B   | 0.0306  |
|  | WARS     | -0.0306 |  |  | ARL17P1  | -0.0306 |
|  | CTLA4    | -0.0305 |  |  | COX4I1   | 0.0304  |
|  | BCOR     | 0.0305  |  |  | MIR199A2 | -0.0301 |
|  | LRTM1    | -0.0303 |  |  | CDC2     | -0.0299 |

|  |          |         |  |  |           |         |
|--|----------|---------|--|--|-----------|---------|
|  | PERP     | -0.0303 |  |  | CNN3      | 0.0299  |
|  | TIMM8B   | -0.0299 |  |  | IL1RL1    | 0.0299  |
|  | CETP     | -0.0298 |  |  | SAT1      | 0.0299  |
|  | LYL1     | -0.0294 |  |  | EFHD2     | 0.0296  |
|  | ZC3HAV1  | -0.0294 |  |  | HSD17B3   | 0.0295  |
|  | DIDO1    | 0.0294  |  |  | SLC35F5   | 0.0294  |
|  | C12orf29 | -0.0291 |  |  | VPS4B     | 0.0294  |
|  | GBP3     | -0.0291 |  |  | NT5DC2    | -0.0293 |
|  | CD14     | -0.0290 |  |  | TCF25     | 0.0292  |
|  | SMAP2    | -0.0290 |  |  | RHBDD1    | 0.0292  |
|  | OGDHL    | 0.0282  |  |  | NBEA      | -0.0291 |
|  | ITK      | -0.0280 |  |  | LOC148413 | 0.0290  |
|  | ZNF660   | 0.0278  |  |  | RARRES3   | 0.0290  |
|  | CCDC46   | 0.0277  |  |  | A1BG      | -0.0287 |
|  | BPTF     | 0.0276  |  |  | FBS1      | -0.0286 |
|  | FALZ     | 0.0276  |  |  | FBRS      | -0.0286 |
|  | LST1     | -0.0274 |  |  | HIST1H4L  | -0.0284 |
|  | TMEM229B | -0.0273 |  |  | RSL24D1   | 0.0283  |
|  | OSM      | -0.0272 |  |  | ATP6V1F   | 0.0280  |
|  | SH3GL1   | -0.0272 |  |  | DBF4B     | -0.0279 |
|  | RTKN     | 0.0271  |  |  | SRRM1     | 0.0277  |
|  | ZNF141   | 0.0269  |  |  | C13orf3   | -0.0274 |
|  | DTX3L    | -0.0268 |  |  | KCNMA1    | 0.0270  |
|  | AEBP2    | -0.0267 |  |  | ZNF687    | -0.0268 |
|  | IFI35    | -0.0266 |  |  | ESPL1     | -0.0266 |
|  | FUCA2    | -0.0266 |  |  | LG12      | -0.0262 |
|  | SIGLEC12 | -0.0265 |  |  | MMP16     | -0.0258 |
|  | MTPAP    | 0.0265  |  |  | BACE2     | 0.0256  |
|  | PAPD1    | 0.0265  |  |  | MXRA8     | -0.0255 |
|  | PSMB8    | -0.0263 |  |  | MIR550-2  | -0.0252 |
|  | SR140    | 0.0261  |  |  | BIVM      | -0.0251 |
|  | RNPS1    | 0.0261  |  |  | SP100     | 0.0251  |
|  | GRN      | -0.0259 |  |  | ANXA5     | 0.0250  |
|  | GRWD1    | -0.0257 |  |  | HIST1H3H  | -0.0248 |
|  | C11orf17 | -0.0256 |  |  | RELA      | 0.0248  |
|  | SLC43A2  | -0.0252 |  |  | UBTD2     | -0.0246 |
|  | DZIP1    | 0.0251  |  |  | TAF10     | 0.0245  |
|  | ITGB2    | -0.0247 |  |  | TWF1      | 0.0244  |
|  | GPR84    | -0.0246 |  |  | CHORDC1   | -0.0243 |
|  | NCAM1    | 0.0246  |  |  | SAMD1     | -0.0240 |
|  | PNN      | 0.0245  |  |  | KIF4A     | -0.0237 |
|  | MPPED2   | 0.0244  |  |  | PQLC3     | 0.0237  |

|  |           |         |  |  |              |         |
|--|-----------|---------|--|--|--------------|---------|
|  | TWF1      | -0.0242 |  |  | SNRNP48      | -0.0235 |
|  | ANKRD11   | 0.0238  |  |  | C5orf13      | -0.0235 |
|  | ISG20     | -0.0238 |  |  | ZNF593       | 0.0234  |
|  | CENPK     | 0.0234  |  |  | LOC100133991 | 0.0234  |
|  | PEG10     | 0.0229  |  |  | CHEK2        | -0.0231 |
|  | CLEC2B    | -0.0227 |  |  | NFATC4       | -0.0231 |
|  | ZMYM3     | 0.0226  |  |  | ZFAND2B      | 0.0231  |
|  | P2RY10    | -0.0226 |  |  | KIF11        | -0.0228 |
|  | FCGR1A    | -0.0222 |  |  | BAT2         | -0.0227 |
|  | ACOT9     | -0.0222 |  |  | TARBP2       | -0.0224 |
|  | EMILIN2   | -0.0221 |  |  | C1orf50      | 0.0223  |
|  | ARHGAP18  | -0.0220 |  |  | HELQ         | 0.0221  |
|  | ZNF816A   | -0.0219 |  |  | DSCR4        | -0.0219 |
|  | EFHD2     | -0.0219 |  |  | TMEM137      | -0.0219 |
|  | LSM1      | -0.0217 |  |  | MIR541       | -0.0218 |
|  | GEMIN5    | 0.0215  |  |  | UBA7         | 0.0217  |
|  | RASSF4    | -0.0213 |  |  | RSPRY1       | 0.0215  |
|  | HIST1H2BF | 0.0207  |  |  | EIF2B5       | 0.0214  |
|  | H3F3A     | 0.0204  |  |  | SLC13A3      | -0.0211 |
|  | CLEC12A   | -0.0203 |  |  | HLTF         | -0.0210 |
|  | CLSTN3    | 0.0203  |  |  | WDHD1        | -0.0209 |
|  | TNFRSF1B  | -0.0200 |  |  | WIBG         | 0.0208  |
|  | CXorf57   | -0.0199 |  |  | RPL11        | 0.0206  |
|  | KCNIP2    | 0.0198  |  |  | UBE2T        | -0.0206 |
|  | ZMYM2     | 0.0195  |  |  | C17orf96     | -0.0206 |
|  | SMG5      | -0.0195 |  |  | TSGA14       | -0.0202 |
|  | MYST4     | 0.0195  |  |  | DENND4A      | 0.0201  |
|  | HOOK2     | 0.0194  |  |  | STMN2        | -0.0201 |
|  | LOC550643 | -0.0194 |  |  | ZMYM3        | -0.0199 |
|  | CD80      | -0.0193 |  |  | GATC         | -0.0197 |
|  | SELL      | -0.0192 |  |  | SNORA77      | -0.0196 |
|  | LILRB3    | -0.0189 |  |  | PCDHGB1      | -0.0195 |
|  | INTS5     | 0.0187  |  |  | LEPREL1      | 0.0195  |
|  | HCST      | -0.0186 |  |  | BPTF         | -0.0191 |
|  | RIOK3     | -0.0186 |  |  | FALZ         | -0.0191 |
|  | LILRB4    | -0.0186 |  |  | ARL6IP4      | -0.0190 |
|  | C1QC      | -0.0185 |  |  | HOXC5        | -0.0189 |
|  | CD96      | -0.0185 |  |  | C11orf47     | -0.0188 |
|  | EFNA1     | -0.0184 |  |  | ATP2A1       | -0.0187 |
|  | NSD1      | 0.0184  |  |  | HDDC2        | 0.0184  |
|  | PUS7L     | 0.0183  |  |  | ZNF517       | -0.0184 |
|  | LOC55908  | -0.0182 |  |  | MIR125A      | -0.0184 |



|  |          |         |  |  |           |         |
|--|----------|---------|--|--|-----------|---------|
|  | PYCR2    | 0.0182  |  |  | F2RL2     | -0.0180 |
|  | ZMYM5    | 0.0182  |  |  | RFC3      | -0.0180 |
|  | C4orf32  | -0.0182 |  |  | WBP2NL    | -0.0177 |
|  | FCGR2A   | -0.0181 |  |  | SLC44A5   | -0.0176 |
|  | KRT1     | -0.0179 |  |  | COPS7A    | 0.0176  |
|  | DCBLD1   | -0.0175 |  |  | ISLR2     | -0.0176 |
|  | ADPRHL1  | 0.0174  |  |  | GTSE1     | -0.0175 |
|  | C12orf24 | 0.0174  |  |  | PSMB8     | 0.0173  |
|  | SYCP3    | -0.0171 |  |  | ELP3      | 0.0173  |
|  | GNB3     | 0.0170  |  |  | WDR88     | -0.0173 |
|  | TICAM2   | -0.0169 |  |  | PCDH15    | -0.0173 |
|  | U2AF1L2  | -0.0165 |  |  | PERP      | 0.0169  |
|  | ZRSR2    | -0.0165 |  |  | PCDHB12   | -0.0168 |
|  | CEMP1    | 0.0163  |  |  | CD74      | 0.0166  |
|  | OR1D2    | -0.0159 |  |  | HIST1H2AE | -0.0165 |
|  | ECGF1    | -0.0157 |  |  | HIST1H2BC | -0.0165 |
|  | TYMP     | -0.0157 |  |  | SMAP2     | 0.0165  |
|  | CD244    | -0.0156 |  |  | PIGC      | -0.0163 |
|  | BRD3     | 0.0155  |  |  | PCDHB4    | -0.0163 |
|  | SIGLEC5  | -0.0153 |  |  | SLC38A2   | 0.0162  |
|  | B2M      | -0.0152 |  |  | SMC3      | -0.0162 |
|  | R3HDM1   | -0.0151 |  |  | TGFBR2    | 0.0158  |
|  | ZNF34    | 0.0149  |  |  | ZNF696    | -0.0158 |
|  | ATP6V1A  | -0.0148 |  |  | MTHFSD    | 0.0157  |
|  | CLK2P    | 0.0148  |  |  | TLX1      | -0.0153 |
|  | NUP85    | 0.0147  |  |  | GALM      | 0.0153  |
|  | TXLNA    | -0.0145 |  |  | PRR11     | -0.0152 |
|  | PCDHB17  | 0.0144  |  |  | PJA2      | 0.0152  |
|  | RBM17    | 0.0142  |  |  | RALGAPA1  | 0.0152  |
|  | FXYD1    | 0.0141  |  |  | ZNF843    | -0.0151 |
|  | PCDH10   | 0.0141  |  |  | CIB1      | 0.0150  |
|  | TRAF1    | -0.0141 |  |  | EFNB2     | -0.0149 |
|  | DNPEP    | 0.0140  |  |  | MLC1      | -0.0147 |
|  | MIR200A  | 0.0140  |  |  | C16orf75  | -0.0147 |
|  | VAMP8    | -0.0136 |  |  | ZKSCAN3   | -0.0146 |
|  | ZCCHC8   | 0.0135  |  |  | NRARP     | -0.0145 |
|  | RUNX3    | -0.0134 |  |  | PDCD6     | -0.0140 |
|  | CDCP1    | -0.0134 |  |  | RAD51AP1  | -0.0139 |
|  | MIR1301  | 0.0134  |  |  | TTC21B    | -0.0138 |
|  | YPEL1    | 0.0132  |  |  | CASC5     | -0.0135 |
|  | HADH     | -0.0132 |  |  | ZNF48     | -0.0134 |
|  | OSCAR    | -0.0129 |  |  | PGF       | -0.0133 |

|  |           |         |  |  |           |         |
|--|-----------|---------|--|--|-----------|---------|
|  | LRP11     | -0.0122 |  |  | SPC24     | -0.0133 |
|  | CREBBP    | 0.0121  |  |  | RGL1      | 0.0131  |
|  | LAX1      | -0.0120 |  |  | PRAGMIN   | 0.0131  |
|  | WVOX      | 0.0117  |  |  | TMEM198   | -0.0130 |
|  | C14orf167 | 0.0114  |  |  | ELAVL3    | -0.0130 |
|  | PLEKHO1   | -0.0114 |  |  | MGC70857  | -0.0130 |
|  | ZMPSTE24  | -0.0112 |  |  | MKI67     | -0.0129 |
|  | FAM168B   | 0.0111  |  |  | PGBD1     | -0.0126 |
|  | JAK2      | -0.0111 |  |  | LOC151162 | 0.0126  |
|  | RASGRP4   | -0.0110 |  |  | ST8SIA2   | -0.0125 |
|  | TMEM108   | 0.0107  |  |  | ZNF286A   | -0.0125 |
|  | FGR       | -0.0107 |  |  | TMEM108   | -0.0123 |
|  | LOC148413 | -0.0106 |  |  | ST3GAL6   | 0.0123  |
|  | ARMC9     | 0.0104  |  |  | NRXN1     | -0.0119 |
|  | ADRA2C    | 0.0103  |  |  | PRSS42    | -0.0118 |
|  | PYCRL     | 0.0103  |  |  | ITM2C     | -0.0118 |
|  | FTSJ2     | -0.0100 |  |  | ANO6      | 0.0116  |
|  | CAPRIN2   | 0.0098  |  |  | RSPO4     | -0.0111 |
|  | MPZL2     | -0.0097 |  |  | DHX40     | -0.0110 |
|  | AMMECR1L  | -0.0093 |  |  | HIST1H3F  | -0.0108 |
|  | MAN1C1    | 0.0093  |  |  | PHF23     | 0.0107  |
|  | POLR3D    | 0.0092  |  |  | ZNF639    | 0.0107  |
|  | GRB2      | -0.0092 |  |  | ANKRA2    | 0.0106  |
|  | ZFP41     | 0.0092  |  |  | RHOU      | 0.0105  |
|  | IDUA      | 0.0091  |  |  | GLTSCR2   | 0.0105  |
|  | ZBTB46    | 0.0089  |  |  | GM2A      | 0.0101  |
|  | PLAC8     | -0.0088 |  |  | CCPG1     | 0.0101  |
|  | SASH1     | -0.0085 |  |  | PIK3R5    | 0.0101  |
|  | EFNB1     | 0.0084  |  |  | TCOF1     | -0.0100 |
|  | ARL6IP4   | 0.0083  |  |  | LSM4      | -0.0098 |
|  | USF1      | -0.0083 |  |  | AGAP1     | -0.0098 |
|  | SALL2     | 0.0080  |  |  | CENTG2    | -0.0098 |
|  | ING1      | 0.0080  |  |  | FGFR4     | -0.0097 |
|  | ZNF784    | -0.0072 |  |  | HNRNPL    | -0.0097 |
|  | HLA-DMB   | -0.0069 |  |  | KIAA1324L | -0.0096 |
|  | IL21R     | -0.0064 |  |  | GNB3      | -0.0090 |
|  | NUDT16L1  | 0.0063  |  |  | IGF2R     | 0.0090  |
|  | WDR77     | 0.0062  |  |  | SLC9A1    | 0.0090  |
|  | RCOR3     | 0.0060  |  |  | HOXC6     | -0.0090 |
|  | RBM39     | 0.0060  |  |  | E2F5      | -0.0088 |
|  | PRR8      | 0.0059  |  |  | ZNF600    | 0.0087  |
|  | TMEM154   | -0.0059 |  |  | CYFIP2    | 0.0084  |

|  |           |         |  |  |           |         |
|--|-----------|---------|--|--|-----------|---------|
|  | CCND3     | -0.0059 |  |  | FRG1      | 0.0083  |
|  | PXMP2     | 0.0058  |  |  | ZNF559    | -0.0080 |
|  | SRM       | -0.0056 |  |  | FAF2      | 0.0080  |
|  | YME1L1    | 0.0056  |  |  | NUDT15    | 0.0080  |
|  | FLJ27365  | 0.0056  |  |  | C10orf12  | -0.0079 |
|  | PCDHB10   | 0.0054  |  |  | FOXP4     | -0.0078 |
|  | RARRES3   | -0.0052 |  |  | CENPK     | -0.0078 |
|  | TUBA4A    | -0.0050 |  |  | TOMM7     | 0.0078  |
|  | STIP1     | 0.0048  |  |  | TAPBPL    | 0.0076  |
|  | SYNPR     | -0.0046 |  |  | CUTC      | 0.0075  |
|  | CARD6     | -0.0046 |  |  | APOC3     | -0.0075 |
|  | ADAM15    | -0.0046 |  |  | REEP5     | 0.0074  |
|  | LOC650152 | -0.0045 |  |  | CNOT3     | -0.0070 |
|  | ZNF286A   | 0.0045  |  |  | LSM14B    | -0.0070 |
|  | EBAG9     | 0.0045  |  |  | SMR3B     | -0.0067 |
|  | MADD      | 0.0043  |  |  | MED12     | -0.0066 |
|  | SEMA6D    | 0.0042  |  |  | DEPDC1    | -0.0065 |
|  | RAP1B     | -0.0039 |  |  | LOC342994 | -0.0060 |
|  | NCSTN     | -0.0038 |  |  | HIST1H2BO | -0.0058 |
|  | MIR638    | 0.0037  |  |  | SEL1L3    | 0.0057  |
|  | IL1RL1    | -0.0036 |  |  | OSCAR     | 0.0057  |
|  | CD302     | -0.0035 |  |  | PSORS1C3  | 0.0056  |
|  | TSPAN33   | -0.0035 |  |  | GMFB      | 0.0055  |
|  | GLRX      | -0.0034 |  |  | AOF2      | 0.0055  |
|  | RPL27     | 0.0033  |  |  | GTF2A1    | 0.0055  |
|  | MTL5      | 0.0031  |  |  | TMEM5     | 0.0054  |
|  | C1orf50   | -0.0027 |  |  | VTI1B     | 0.0054  |
|  | YARS      | -0.0025 |  |  | RHBDL2    | 0.0053  |
|  | CHST3     | 0.0025  |  |  | INTS8     | -0.0052 |
|  | RBM4      | 0.0025  |  |  | SCARNA22  | -0.0052 |
|  | WFIKKN1   | 0.0024  |  |  | SNAP23    | 0.0050  |
|  | DHRS12    | 0.0023  |  |  | FCGR1A    | 0.0050  |
|  | LOC143543 | 0.0022  |  |  | CTU2      | -0.0048 |
|  | DDX56     | 0.0020  |  |  | IL18      | 0.0047  |
|  | MED19     | -0.0018 |  |  | MIR760    | -0.0046 |
|  | ALDH4A1   | -0.0018 |  |  | STX4      | 0.0046  |
|  | HECTD3    | -0.0016 |  |  | BSCL2     | 0.0045  |
|  | SIDT2     | -0.0016 |  |  | COPA      | 0.0045  |
|  | SELI      | 0.0014  |  |  | C6orf192  | 0.0044  |
|  | GBA3      | -0.0013 |  |  | LTB4R2    | -0.0043 |
|  | SHMT1     | 0.0009  |  |  | SV2C      | -0.0043 |
|  | MICB      | -0.0006 |  |  | MYO10     | 0.0042  |

|  |           |         |  |  |               |         |
|--|-----------|---------|--|--|---------------|---------|
|  | GYG1      | -0.0006 |  |  | C7orf50       | 0.0042  |
|  | LOC154822 | -0.0006 |  |  | DRD4          | -0.0041 |
|  | ZSCAN2    | 0.0006  |  |  | C1orf35       | -0.0040 |
|  | ITGA6     | -0.0004 |  |  | KIF1B         | 0.0038  |
|  | TMEM9B    | -0.0003 |  |  | UBE2I         | -0.0036 |
|  | DIS3L     | -0.0001 |  |  | CD44          | 0.0034  |
|  | COPS6     | 0.0001  |  |  | SLC4A3        | -0.0031 |
|  | FSIP1     | 0.0001  |  |  | C16orf67      | -0.0031 |
|  |           |         |  |  | HNRPH1        | -0.0030 |
|  |           |         |  |  | HNRNPH1       | -0.0030 |
|  |           |         |  |  | C5orf43       | 0.0027  |
|  |           |         |  |  | DKFZP686E2158 | 0.0027  |
|  |           |         |  |  | MSH5          | -0.0026 |
|  |           |         |  |  | PPAP2A        | 0.0026  |
|  |           |         |  |  | SELV          | -0.0024 |
|  |           |         |  |  | RPP30         | -0.0024 |
|  |           |         |  |  | ROD1          | 0.0024  |
|  |           |         |  |  | ACSM5         | 0.0021  |
|  |           |         |  |  | RASGRP4       | 0.0021  |
|  |           |         |  |  | PPIL3         | -0.0020 |
|  |           |         |  |  | FUNDC2        | -0.0018 |
|  |           |         |  |  | SNN           | -0.0018 |
|  |           |         |  |  | ZNF677        | -0.0017 |
|  |           |         |  |  | RPL30         | -0.0015 |
|  |           |         |  |  | EMILIN3       | -0.0014 |
|  |           |         |  |  | MRPL18        | 0.0014  |
|  |           |         |  |  | MIR25         | -0.0013 |
|  |           |         |  |  | CUX1          | -0.0012 |
|  |           |         |  |  | CUTL1         | -0.0012 |
|  |           |         |  |  | GSTO1         | 0.0012  |
|  |           |         |  |  | AVPR1A        | -0.0008 |
|  |           |         |  |  | DLX4          | -0.0005 |
|  |           |         |  |  | PTAR1         | 0.0004  |
