# Supplementary material
Source: HighWire-hosted journal article supplement (https://hw-f5-jim.highwire.org/content/jim-2017-000457)
Supplement: inline-supplementary-material-3 [file inline-supplementary-material-3.pdf]

| Module               | Geneset                                                                           | P Value | Odds Ratio | Adjusted P Value |
|----------------------|-----------------------------------------------------------------------------------|---------|------------|------------------|
| Immunological Module | REACTOME_IMMUNE_SYSTEM                                                            | 0.00000 | 3.01558    | 0.00000          |
| Immunological Module | REACTOME_IMMUNOREGULATORY_INTERACTIONS_BETWEEN_A_LYMPHOID_AND_A_NON_LYMPHOID_CELL | 0.00000 | 10.44369   | 0.00000          |
| Immunological Module | PID_IL12_STAT4_PATHWAY                                                            | 0.00000 | 15.89957   | 0.00003          |
| Immunological Module | REACTOME_ADAPTIVE_IMMUNE_SYSTEM                                                   | 0.00000 | 2.90630    | 0.00004          |
| Immunological Module | KEGG_NATURAL_KILLER_CELL_MEDIATED_CYTOTOXICITY                                    | 0.00000 | 6.02636    | 0.00005          |
| Immunological Module | KEGG_SYSTEMIC_LUPUS_ERYTHEMATOSUS                                                 | 0.00000 | 5.41138    | 0.00015          |
| Immunological Module | PID_IL12_2PATHWAY                                                                 | 0.00000 | 8.22179    | 0.00034          |
| Immunological Module | BIOCARTA_CTLA4_PATHWAY                                                            | 0.00001 | 17.67200   | 0.00104          |
| Immunological Module | BIOCARTA_CTL_PATHWAY                                                              | 0.00001 | 25.25499   | 0.00161          |
| Immunological Module | KEGG_LEISHMANIA_INFECTION                                                         | 0.00001 | 6.42797    | 0.00161          |
| Immunological Module | KEGG_ANTIGEN_PROCESSING_AND_PRESENTATION                                          | 0.00002 | 6.09559    | 0.00204          |
| Immunological Module | KEGG_AUTOIMMUNE_THYROID_DISEASE                                                   | 0.00002 | 10.31298   | 0.00204          |
| Immunological Module | KEGG_TYPE_I_DIABETES_MELLITUS                                                     | 0.00003 | 9.51715    | 0.00270          |
| Immunological Module | KEGG_GRAFT_VERSUS_HOST_DISEASE                                                    | 0.00003 | 9.51715    | 0.00270          |
| Immunological Module | KEGG_CELL_ADHESION_MOLECULES_CAMS                                                 | 0.00004 | 4.21698    | 0.00343          |
| Immunological Module | KEGG_ALLOGRAFT_REJECTION                                                          | 0.00010 | 9.64259    | 0.00834          |
| Immunological Module | KEGG_PRION_DISEASES                                                               | 0.00012 | 9.22171    | 0.00966          |
| Immunological Module | REACTOME_CYTOKINE_SIGNALING_IN_IMMUNE_SYSTEM                                      | 0.00015 | 2.87999    | 0.01143          |
| Immunological Module | REACTOME_INTERFERON_GAMMA_SIGNALING                                               | 0.00017 | 5.77266    | 0.01200          |
| Immunological Module | KEGG_HEMATOPOIETIC_CELL_LINEAGE                                                   | 0.00021 | 4.89585    | 0.01402          |
| Immunological Module | BIOCARTA_THELPER_PATHWAY                                                          | 0.00024 | 17.67198   | 0.01531          |
| Immunological Module | REACTOME_INNATE_IMMUNE_SYSTEM                                                     | 0.00027 | 2.94664    | 0.01646          |
| Immunological Module | KEGG_VIRAL_MYOCARDITIS                                                            | 0.00031 | 5.23785    | 0.01706          |
| Immunological Module | BIOCARTA_NO2IL12_PATHWAY                                                          | 0.00034 | 15.70324   | 0.01706          |
| Immunological Module | BIOCARTA_TH1TH2_PATHWAY                                                           | 0.00034 | 15.70324   | 0.01706          |
| Immunological Module | REACTOME_TRAF6_MEDIATED_INDUCION_OF_TAK1_COMPLEX                                  | 0.00034 | 15.70324   | 0.01706          |
| Immunological Module | KEGG_TOLL_LIKE_RECEPTOR_SIGNALING_PATHWAY                                         | 0.00035 | 4.54580    | 0.01706          |
| Immunological Module | PID_CXCR4_PATHWAY                                                                 | 0.00038 | 4.06416    | 0.01792          |
| Immunological Module | KEGG_JAK_STAT_SIGNALING_PATHWAY                                                   | 0.00047 | 3.63473    | 0.02164          |
| Immunological Module | REACTOME_INTERFERON_SIGNALING                                                     | 0.00057 | 3.31491    | 0.02545          |
| Immunological Module | PID_IL2_STAT5_PATHWAY                                                             | 0.00065 | 8.41727    | 0.02808          |
| Immunological Module | BIOCARTA_IL12_PATHWAY                                                             | 0.00081 | 11.78220   | 0.03379          |
| Immunological Module | REACTOME_CREATION_OF_C4_AND_C2_ACTIVATORS                                         | 0.00106 | 21.20233   | 0.04281          |
| Immunological Module | ST_T_CELL_SIGNAL_TRANSDUCTION                                                     | 0.00114 | 5.73388    | 0.04444          |
| Immunological Module | PID_PI3KCI_PATHWAY                                                                | 0.00128 | 5.58179    | 0.04882          |
| Malignancy Module    | REACTOME_CELL_CYCLE                                                               | 0.00000 | 3.90163    | 0.00000          |
| Malignancy Module    | KEGG_SYSTEMIC_LUPUS_ERYTHEMATOSUS                                                 | 0.00000 | 6.85359    | 0.00000          |
| Malignancy Module    | REACTOME_RNA_POL_I_PROMOTER_OPENING                                               | 0.00000 | 10.74950   | 0.00000          |
| Malignancy Module    | REACTOME_RNA_POL_I_TRANSCRIPTION                                                  | 0.00000 | 8.07380    | 0.00000          |
| Malignancy Module    | REACTOME_TRANSCRIPTION                                                            | 0.00000 | 4.67007    | 0.00000          |
| Malignancy Module    | REACTOME_DNA_REPLICATION                                                          | 0.00000 | 4.75236    | 0.00000          |
| Malignancy Module    | REACTOME_CELL_CYCLE_MITOTIC                                                       | 0.00000 | 3.71162    | 0.00000          |
| Malignancy Module    | REACTOME_RNA_POL_I_RNA_POL_III_AND_MITOCHONDRIAL_TRANSCRIPTION                    | 0.00000 | 6.26584    | 0.00000          |
| Malignancy Module    | REACTOME_MEIOTIC_RECOMBINATION                                                    | 0.00000 | 8.04648    | 0.00000          |
| Malignancy Module    | REACTOME_MEIOSIS                                                                  | 0.00000 | 6.53664    | 0.00000          |
| Malignancy Module    | REACTOME_AMYLOIDS                                                                 | 0.00000 | 8.01518    | 0.00001          |
| Malignancy Module    | REACTOME_CHROMOSOME_MAINTENANCE                                                   | 0.00000 | 5.41111    | 0.00007          |
| Malignancy Module    | REACTOME_DEPOSITION_OF_NEW_CENPA_CONTAINING_NUCLEOSOMES_AT_THE_CENTROMERE         | 0.00000 | 7.93662    | 0.00008          |
| Malignancy Module    | REACTOME_MITOTIC_M_M_G1_PHASES                                                    | 0.00000 | 4.29897    | 0.00011          |
| Malignancy Module    | REACTOME_G1_S_TRANSITION                                                          | 0.00004 | 4.52156    | 0.00368          |
| Malignancy Module    | REACTOME_MITOTIC_G1_G1_S_PHASES                                                   | 0.00007 | 3.93643    | 0.00620          |
| Malignancy Module    | REACTOME_FACTORS_INVOLVED_IN_MEGAKARYOCYTE_DEVELOPMENT_AND_PLATELET_PRODUCTION    | 0.00008 | 4.19538    | 0.00625          |

|                   |                                                                                 |         |          |         |
|-------------------|---------------------------------------------------------------------------------|---------|----------|---------|
| Malignancy Module | REACTOME_MEIOTIC_SYNAPSIS                                                       | 0.00010 | 5.44968  | 0.00764 |
| Malignancy Module | REACTOME_TELOMERE_MAINTENANCE                                                   | 0.00015 | 5.17283  | 0.01032 |
| Malignancy Module | REACTOME_SYNTHESIS_OF_DNA                                                       | 0.00016 | 4.58255  | 0.01057 |
| Malignancy Module | REACTOME_REGULATION_OF_MITOTIC_CELL_CYCLE                                       | 0.00021 | 4.92296  | 0.01297 |
| Malignancy Module | REACTOME_PACKAGING_OF_TELOMERE_ENDS                                             | 0.00021 | 6.59333  | 0.01297 |
| Malignancy Module | REACTOME_CYCLIN_E_ASSOCIATED_EVENTS_DURING_G1_S_TRANSITION                      | 0.00032 | 5.21701  | 0.01864 |
| Malignancy Module | REACTOME_ORC1_REMOVAL_FROM_CHROMATIN                                            | 0.00040 | 5.02460  | 0.02242 |
| Malignancy Module | REACTOME_S_PHASE                                                                | 0.00065 | 3.76844  | 0.03407 |
| Malignancy Module | REACTOME_MITOTIC_PROMETAPHASE                                                   | 0.00067 | 4.12453  | 0.03407 |
| Malignancy Module | KEGG_CELL_CYCLE                                                                 | 0.00081 | 3.39137  | 0.03983 |
| Malignancy Module | REACTOME_CELL_CYCLE_CHECKPOINTS                                                 | 0.00096 | 3.56978  | 0.04548 |
| Malignancy Module | REACTOME_APC_C_CDC20_MEDIATED_DEGRADATION_OF_MITOTIC_PROTEINS                   | 0.00152 | 4.56496  | 0.06959 |
| Malignancy Module | REACTOME_MITOTIC_G2_G2_M_PHASES                                                 | 0.00158 | 3.98982  | 0.06993 |
| Malignancy Module | REACTOME_ASSEMBLY_OF_THE_PRE_REPLICATIVE_COMPLEX                                | 0.00168 | 4.47909  | 0.07187 |
| Malignancy Module | REACTOME_P53_INDEPENDENT_G1_S_DNA_DAMAGE_CHECKPOINT                             | 0.00177 | 5.21701  | 0.07375 |
| Malignancy Module | REACTOME_SCF_BETA_TRCP_MEDIATED_DEGRADATION_OF_EMI1                             | 0.00199 | 5.08618  | 0.08024 |
| Malignancy Module | REACTOME_METABOLISM_OF_RNA                                                      | 0.00282 | 2.31903  | 0.11032 |
| Malignancy Module | REACTOME_G0_AND_EARLY_G1                                                        | 0.00331 | 7.53664  | 0.12510 |
| Malignancy Module | REACTOME_SCFSKP2_MEDIATED_DEGRADATION_OF_P27_P21                                | 0.00339 | 4.52155  | 0.12510 |
| Malignancy Module | REACTOME_AUTODEGRADATION_OF_CDH1_BY_CDH1_APC_C                                  | 0.00374 | 4.42316  | 0.13427 |
| Malignancy Module | REACTOME_M_G1_TRANSITION                                                        | 0.00511 | 3.59676  | 0.17875 |
| Malignancy Module | REACTOME_ACTIVATION_OF_NF_KAPPAB_IN_B_CELLS                                     | 0.00641 | 3.91316  | 0.21874 |
| Malignancy Module | REACTOME_APC_C_CDH1_MEDIATED_DEGRADATION_OF_CDC20_AND_OTHER_APC_C_CDH1_TARGETED | 0.00697 | 3.83943  | 0.23171 |
| Malignancy Module | REACTOME_CROSS_PRESENTATION_OF_SOLUBLE_EXOGENOUS_ANTIGENS_ENDOSOMES             | 0.00765 | 4.46262  | 0.24236 |
| Malignancy Module | REACTOME_CDK_MEDIATED_PHOSPHORYLATION_AND_REMOVAL_OF_CDC6                       | 0.00765 | 4.46262  | 0.24236 |
| Malignancy Module | REACTOME_CYCLIN_A_B1_ASSOCIATED_EVENTS_DURING_G2_M_TRANSITION                   | 0.00834 | 8.47689  | 0.25489 |
| Malignancy Module | REACTOME_AUTODEGRADATION_OF_THE_E3_UBIQUITIN_LIGASE_COP1                        | 0.00843 | 4.34752  | 0.25489 |
| Malignancy Module | BIOCARTA_P53_PATHWAY                                                            | 0.01004 | 7.82586  | 0.28727 |
| Malignancy Module | REACTOME_G1_S_SPECIFIC_TRANSCRIPTION                                            | 0.01004 | 7.82586  | 0.28727 |
| Malignancy Module | REACTOME_VIF_MEDIATED_DEGRADATION_OF_APOBEC3G                                   | 0.01015 | 4.13570  | 0.28727 |
| Malignancy Module | REACTOME_CLASS_I_MHC_MEDIATED_ANTIGEN_PROCESSING_PRESENTATION                   | 0.01065 | 2.17198  | 0.29513 |
| Malignancy Module | KEGG_PANCREATIC_CANCER                                                          | 0.01104 | 3.44884  | 0.29513 |
| Malignancy Module | REACTOME_DESTABILIZATION_OF_MRNA_BY_AUF1_HNRNP_D0                               | 0.01110 | 4.03728  | 0.29513 |
| Malignancy Module | REACTOME_ANTIGEN_PROCESSING_CROSS_PRESENTATION                                  | 0.01186 | 3.39137  | 0.30530 |
| Malignancy Module | REACTOME_APC_C_CDC20_MEDIATED_DEGRADATION_OF_CYCLIN_B                           | 0.01194 | 7.26490  | 0.30530 |
| Malignancy Module | KEGG_P53_SIGNALING_PATHWAY                                                      | 0.01271 | 3.33578  | 0.31865 |
| Malignancy Module | REACTOME_E2F_MEDIATED_REGULATION_OF_DNA_REPLICATION                             | 0.01294 | 4.84467  | 0.31865 |
| Malignancy Module | KEGG_CHRONIC_MYELOID_LEUKEMIA                                                   | 0.01361 | 3.28198  | 0.32907 |
| Malignancy Module | REACTOME_P53_DEPENDENT_G1_DNA_DAMAGE_RESPONSE                                   | 0.01428 | 3.76845  | 0.33570 |
| Malignancy Module | PID_E2F_PATHWAY                                                                 | 0.01455 | 3.22988  | 0.33570 |
| Malignancy Module | REACTOME_PROCESSING_OF_CAPPED_INTRON_CONTAINING_PRE_MRNA                        | 0.01464 | 2.48150  | 0.33570 |
| Malignancy Module | REACTOME_REGULATION_OF_APOPTOSIS                                                | 0.01546 | 3.68587  | 0.34277 |
| Malignancy Module | REACTOME_CDT1_ASSOCIATION_WITH_THE_CDC6_ORC_ORIGIN_COMPLEX                      | 0.01546 | 3.68587  | 0.34277 |
| Malignancy Module | REACTOME_REGULATION_OF_THE_FANCONI_ANEMIA_PATHWAY                               | 0.01573 | 13.55914 | 0.34306 |
| Malignancy Module | REACTOME_TRANSPORT_OF_MATURE_TRANSCRIPT_TO_CYTOPLASM                            | 0.01671 | 3.60767  | 0.35847 |
| Malignancy Module | REACTOME_ANTIGEN_PROCESSING_UBIQUITINATION_PROTEASOME_DEGRADATION               | 0.01723 | 2.18175  | 0.36345 |
| Malignancy Module | REACTOME_G1_PHASE                                                               | 0.01760 | 4.37575  | 0.36345 |
| Malignancy Module | REACTOME_METABOLISM_OF_MRNA                                                     | 0.01787 | 2.08716  | 0.36345 |
| Malignancy Module | BIOCARTA_ATM_PATHWAY                                                            | 0.01877 | 5.98403  | 0.36345 |
| Malignancy Module | REACTOME_FANCONI_ANEMIA_PATHWAY                                                 | 0.01877 | 5.98403  | 0.36345 |
| Malignancy Module | KEGG_SNARE_INTERACTIONS_IN_VESICULAR_TRANSPORT                                  | 0.01936 | 4.23906  | 0.36345 |
| Malignancy Module | KEGG_TYPE_II_DIABETES_MELLITUS                                                  | 0.01936 | 4.23906  | 0.36345 |
| Malignancy Module | REACTOME_ER_PHAGOSOME_PATHWAY                                                   | 0.01940 | 3.46057  | 0.36345 |

|                   |                                                                    |         |         |         |
|-------------------|--------------------------------------------------------------------|---------|---------|---------|
| Malignancy Module | REACTOME_LOSS_OF_NLP_FROM_MITOTIC_CENTROSOMES                      | 0.01940 | 3.46057 | 0.36345 |
| Malignancy Module | REACTOME_MEMBRANE_TRAFFICKING                                      | 0.02030 | 2.48907 | 0.36970 |
| Malignancy Module | REACTOME_HOST_INTERACTIONS_OF_HIV_FACTORS                          | 0.02030 | 2.48907 | 0.36970 |
| Malignancy Module | REACTOME_INTERFERON_SIGNALING                                      | 0.02064 | 2.33009 | 0.36970 |
| Malignancy Module | REACTOME_RIG_I_MDA5_MEDIATED_INDUCION_OF_IFN_ALPHA_BETA_PATHWAYS   | 0.02085 | 3.39137 | 0.36970 |
| Malignancy Module | PID_P73PATHWAY                                                     | 0.02115 | 2.94907 | 0.37008 |
| Malignancy Module | REACTOME_CYTOKINE_SIGNALING_IN_IMMUNE_SYSTEM                       | 0.02254 | 1.95096 | 0.38937 |
| Malignancy Module | PID_ATR_PATHWAY                                                    | 0.02526 | 3.87594 | 0.41998 |
| Malignancy Module | PID_FOXM1_PATHWAY                                                  | 0.02526 | 3.87594 | 0.41998 |
| Malignancy Module | REACTOME_CLEAVAGE_OF_GROWING_TRANSCRIPT_IN_THE_TERMINATION_REGION_ | 0.02526 | 3.87594 | 0.41998 |
| Malignancy Module | REACTOME_NFKB_IS_ACTIVATED_AND_SIGNALS_SURVIVAL                    | 0.02596 | 9.68763 | 0.42107 |
| Malignancy Module | REACTOME_G2_M_DNA_DAMAGE_CHECKPOINT                                | 0.02596 | 9.68763 | 0.42107 |
| Malignancy Module | BIOCARTA_CELLCYCLE_PATHWAY                                         | 0.02736 | 5.08619 | 0.43313 |
| Malignancy Module | REACTOME_KINESINS                                                  | 0.02736 | 5.08619 | 0.43313 |
| Malignancy Module | REACTOME_SIGNALING_BY_WNT                                          | 0.02912 | 3.08309 | 0.45049 |
| Malignancy Module | KEGG_SMALL_CELL_LUNG_CANCER                                        | 0.02952 | 2.71307 | 0.45049 |
| Malignancy Module | REACTOME_G2_M_CHECKPOINTS                                          | 0.02974 | 3.66600 | 0.45049 |
| Malignancy Module | BIOCARTA_G2_PATHWAY                                                | 0.03061 | 4.84467 | 0.45049 |
| Malignancy Module | REACTOME_HEMOSTASIS                                                | 0.03077 | 1.65237 | 0.45049 |
| Malignancy Module | REACTOME_RECRUITMENT_OF_MITOTIC_CENTROSOME_PROTEINS_AND_COMPLEXES  | 0.03099 | 3.02805 | 0.45049 |
| Malignancy Module | REACTOME_MRNA_PROCESSING                                           | 0.03153 | 2.14962 | 0.45049 |
| Malignancy Module | BIOCARTA_DNAFRAGMENT_PATHWAY                                       | 0.03184 | 8.47688 | 0.45049 |
| Malignancy Module | BIOCARTA_SKP2E2F_PATHWAY                                           | 0.03184 | 8.47688 | 0.45049 |
| Malignancy Module | REACTOME_HYALURONAN_UPTAKE_AND_DEGRADATION                         | 0.03184 | 8.47688 | 0.45049 |
