# Supplementary material
Source: HighWire-hosted journal article supplement (https://hw-f5-jim.highwire.org/content/jim-2017-000457)
Supplement: inline-supplementary-material-4 [file inline-supplementary-material-4.pdf]

| <b>Benign Histology</b> | <b>Number of Subjects</b> |
|-------------------------|---------------------------|
| leiomyoma               | 2                         |
| endometriosis           | 2                         |
| cyst adenofibroma       | 2                         |
| peritoneal inclusion cy | 1                         |
| cystadenoma             | 1                         |
| mucinous cystadenon     | 1                         |
| luteal cyst             | 1                         |
| serous cystadenoma      | 1                         |
| salpingitis             | 1                         |
| mature teratoma         | 1                         |
